# Supplementary material
Source: PubMed Central journal article supplement (PMC5893414)
Supplement: NIHMS944193-supplement-2.pdf [file NIHMS944193-supplement-2.pdf]

## Supplementary Note

### Impact of FDR threshold on subsequent somatic eQTL analysis and summary statistics

Although we reported somatic eQTLs at multiple FDR thresholds (**Fig. 2a**, **Supplementary Table 1**), we used an FDR cutoff of 20% for many of the subsequent analyses. Here, we report a brief summary of our analyses based on a more restrictive 10% FDR threshold, which identifies 27 somatic eQTLs regulating 28 mRNA expression level changes (**Supplementary Table 1**). This smaller set of somatic eQTLs is mutated in 30% of TCGA patients (282 out of 930). Nearly 60% are validated in ICGC (16 of 27, related to **Fig. 2d**). Of the three somatic eQTLs functionally validated using reporter assays (related to **Figs. 3, 4**), one passes the restrictive 10% FDR threshold: *HYI* at 1.6% but not *DAAM1* at 19.6% or *MTG2* at 22.6%. Application of the 10% FDR threshold also influences the molecular pathway analysis (related to **Fig. 5**). Among the four pathway subtypes identified with prominent noncoding mutations, two are also recovered at the restrictive FDR of 10% (“*CDKN2A-EGFR-TERT*” and “*TERT-BRAF-IDH1*”). The other two noncoding subtypes are not identified, as the somatic eQTLs regulating *PEX26* and *APOBEC2* do not pass this more stringent threshold (FDR = 13.4% and 19.0%, respectively).

## Supplementary Tables

**Supplementary Table 1. Full list of somatic eQTL-gene interactions.** Separate Excel file.

**Supplementary Table 2. Full list of somatic eQTLs which disrupt or create transcription factor binding motifs in four or more patients.** Separate Excel file.

**Supplementary Table 3. Percent of mutations in each somatic eQTL.** Separate Excel file.

**Supplementary Table 4. Recapitulation of melanoma somatic eQTLs in the validation cohort.**

|                    | Melanoma somatic eQTLs                                                                                                                                                                                        |
|--------------------|---------------------------------------------------------------------------------------------------------------------------------------------------------------------------------------------------------------|
| Overlapped         | -133161--133158:RTCA, -202--191:DAAM1, +175+216:GLYCTK, +95097+95132:HYI, +605718+605719:TMEM138, -69--61:MAP1S, -81298--81201:TBC1D20, -267580--267538:RUNX3, +754705+754733:LRRRC4B, +826924+826988:METTL16 |
| Discovery set only | +781185+781238:C3orf18, -424468--424424:SF3A2                                                                                                                                                                 |

**Supplementary Table 5. Individual data points for the bar graphs of flow cytometry analysis.** Separate Excel file.

**Supplementary Table 6. Individual data points for the bar graphs of luciferase assays.** Separate Excel file.
